# Supplementary material for: Head-Mounted Virtual Reality and Mental Health: Critical Review of Current Research
Source: PubMed Central journal article supplement (PMC6054705; doi:10.2196/games.9226), 2018-07-06
Supplement: games_v6i3e14_app1.pdf [file games_v6i3e14_app1.pdf]

**TABLE 1 - HEAD MOUNTED VR LITERATURE 2012-2017 (n=82)****Anxiety Disorders (n=42)**

| <u>AUTHOR(S)</u>      | <u>YEAR</u> | <u>COUNTRY</u>  | <u>CONDITION</u>                 | <u>SAMPLE</u> | <u>INTERVENTIONS</u>                                                     | <u>VR USED (HMD alternatives and relevant technologies)</u> |
|-----------------------|-------------|-----------------|----------------------------------|---------------|--------------------------------------------------------------------------|-------------------------------------------------------------|
| Aymerich-Franch et al | 2014        | Spain           | Anxiety                          | 252           | Representative avatars vs non representative avatars for public speaking | nVisor SX111                                                |
| Bouchard et al        | 2016        | Canada          | Anxiety - SAD                    | 59            | VR CBT, CBT                                                              | eMagin z800                                                 |
| Depperman et al       | 2016        | Germany         | Fear of Spiders - Arachnophobia  | 83            | Theta burst stimulation (iTBS) with VR                                   | eMagin Z800                                                 |
| Dibbets et al         | 2015        | The Netherlands | PTSD                             | 39            | VRET, Traditional Trauma Film Paradigm (TFP)                             | nVisor ST-50                                                |
| Diemer et al          | 2013        | Germany         | Fear of spiders                  | 58            | single dose of quetiapine XR, placebo prior to a VR spider challenge     | eMagin Z800                                                 |
| Diemer et al          | 2016        | Germany         | Fear of flying                   | 80            | VRET                                                                     | eMagin Z800                                                 |
| Difede et al          | 2014        | USA             | PTSD (world Trade centre attack) | 25            | VRET with D-cycloserine, VRET with Placebo                               | Kaiser XL-50 VR                                             |
| Freeman et al         | 2014        | UK              | PTSD (Physical assault victims)  | 106           | VR assessment of PTSD and paranoia levels                                | Virtual Research VR1280                                     |
| Freeman et al         | 2013        | UK              | PTSD (Physical assault victims)  | 106           | 6 month follow up of PTSD symptoms                                       | Virtual Research VR1280                                     |
| Glotzbach-            | 2013        | Germany         | Anxiety                          | 49            | VR office with                                                           | eMagin Z800                                                 |

|                  |      |                 |                 |    |                                                                                                                   |                                                             |
|------------------|------|-----------------|-----------------|----|-------------------------------------------------------------------------------------------------------------------|-------------------------------------------------------------|
| Schoon et al     |      |                 |                 |    | electrical stimuli (CXT+), VR office without electrical stimuli (CXT-)                                            |                                                             |
| Hartanto et al   | 2014 | The Netherlands | Anxiety - SAD   | 16 | VR scenarios (neutral, blind date, job interview)                                                                 | eMagin Z800                                                 |
| Kampmann et al   | 2016 | The Netherlands | Anxiety - SAD   | 60 | VRET, iVET, Waiting List                                                                                          | nVisor SX60                                                 |
| Levy et al       | 2016 | France          | Fear of heights | 6  | VRET                                                                                                              | Sony HMZ-T1                                                 |
| Levy et al       | 2016 | France          | Phobia falling  | 16 | VR games                                                                                                          | V8 HMD, EyeToy interface for PlayStation 2, Video projector |
| Malbos et al     | 2013 | Australia       | agoraphobia     | 19 | VRET, VRET with CBT                                                                                               | Virtual Realities HMD Pro 3D-42                             |
| Meyerbroeker     | 2012 | The Netherlands | Fear of flying  | 67 | VRET with Yohimbine Hydrochloride (YHO), VRET with Placebo                                                        | Cybermind Visette Pro                                       |
| Morina et al     | 2014 | The Netherlands | Anxiety         | 43 | VR with varying levels of presence                                                                                | Nvisor SX 60                                                |
| Morina et al     | 2015 | The Netherlands | Anxiety         | 43 | VRET                                                                                                              | nVisor SX 60                                                |
| Mosig et al      | 2014 | Germany         | Arachnophobia   | 43 | VR differential fear conditioning paradigm, paired with either high frequency tone CS+ and low frequency tone CS- | eMagin z800                                                 |
| Muhlberger et al | 2012 | Germany         | Fear of heights | 56 | Depth and belief cues manipulated in VR                                                                           | eMagin z800                                                 |
| Norrholm         | 2016 | USA             | PTSD            | 50 | VR PTSD                                                                                                           | eMagin Z800,                                                |

|                   |      |                 |                        |     |                                                                                     |                                   |
|-------------------|------|-----------------|------------------------|-----|-------------------------------------------------------------------------------------|-----------------------------------|
|                   |      |                 |                        |     | treatment with Administered D-cycloserine (DCS), alprazolam (ALP), or placebo (PBO) |                                   |
| Notzon et al      | 2015 | Germany         | Arachnophobia          | 83  | intermittent theta burst stimulation (iTBS) applied prior to VR experience.         | eMagin Z800,                      |
| Pallavicini et al | 2013 | Italy           | Anxiety                | 39  | Text (TX), Audio (AU), Video (VD), VR                                               | Vuzix VR Bundle, Xbox controller. |
| Peperkorn et al   | 2016 | Germany         | Fear of spiders        | 64  | VR fear exposure                                                                    | eMagin Z800,                      |
| Peperkorn et al   | 2014 | Germany         | Fear of spiders        | 96  | VR perceptual cues                                                                  | eMagin Z800,                      |
| Powers et al      | 2013 | USA             | Anxiety - SAD          | 26  | VRET, In vivo                                                                       | eMagin z800                       |
| Price et al       | 2015 | USA             | PTSD                   | 116 | VRET with <i>D-Cycloserine 50mg or alprazolam 0.25mg, compared to placebo</i>       | eMagin Z800                       |
| Reger et al       | 2016 | USA             | PTSD                   | 162 | Prolonged exposure vs VRE                                                           | eMagin z800                       |
| Rinck et al       | 2015 | The Netherlands | Fear of spiders        | 63  | Immersive Virtual Environment (IVE)                                                 | Nvisor SX60,                      |
| Rothbaum et al    | 2014 | USA             | War veterans with PTSD | 156 | VRET + D-cycloserine, VRET + alprazolam, VRET + placebo                             | eMagin Z800                       |
| Rus-Calafell      | 2013 | Spain           | Fear of Flying         | 15  | Imaginal exposure, VRET                                                             | HMD 5DT model                     |

|              |      |         |                         |    |                                                                                                                                                                    |                                               |
|--------------|------|---------|-------------------------|----|--------------------------------------------------------------------------------------------------------------------------------------------------------------------|-----------------------------------------------|
| Safir et al  | 2012 | Israel  | Public Speaking Anxiety | 88 | VRET + CBT<br>CBT Waiting list                                                                                                                                     | VFX3D from Interactive Imaging Systems        |
| Shiban et al | 2016 | Germany | Claustrophobia          | 96 | VR fear reactions, specific cues (C), fear related information (I) and both.                                                                                       | eMagin Z800                                   |
| Shiban et al | 2016 | Germany | Spider phobia           | 61 | VRET                                                                                                                                                               | eMagin z800                                   |
| Shiban et al | 2015 | Germany | Spider phobia           | 32 | VRET, in vivo                                                                                                                                                      | eMagin Z800                                   |
| Shiban et al | 2015 | Germany | Spider phobia           | 40 | VR with both conditioned stimuli (CS) with aversive reinforcement in terms of air blast and scream (CS+) without aversive reinforcement (CS-)                      | eMagin Z800, Logitech Extreme 3D Pro Joystick |
| Shiban et al | 2015 | Germany | Spider phobia           | 58 | VR single stimulus and single context, VR multiple stimuli and single context, VR single stimulus and multiple contexts, VR multiple stimuli and multiple scenario | eMagin Z800                                   |
| Shiban et al | 2015 | Germany | Spider phobia           | 31 | VRET: standard extinction, gradual extinction, Unconditioned stimuli,                                                                                              | eMagin Z800                                   |

|             |      |             |                |    |                                                       |              |
|-------------|------|-------------|----------------|----|-------------------------------------------------------|--------------|
|             |      |             |                |    | conditioned stimuli                                   |              |
| Urech et al | 2015 | Switzerland | Social Anxiety | 15 | Attention bias training with VR                       | nVisor SX60, |
| Webb et al  | 2015 | USA         | PTSD           | 58 | VRE<br>Physiological reactions measured to VR stimuli | eMagin Z800  |
| Won et al   | 2016 | USA         | Social Anxiety | 57 | VRE to track head movements                           | nVisor sx60, |

\*SAD = Social anxiety disorder

\*PTSD = Post traumatic stress disorder

\*OCD = Obsessive compulsive disorder

#### **Depression/Stress Studies (n=4)**

|                |      |           |            |    |                                                                                   |               |
|----------------|------|-----------|------------|----|-----------------------------------------------------------------------------------|---------------|
| Cikajlo        | 2017 | Slovenia  | Stress     | 8  | Mindfulness                                                                       | GearVR        |
| Falconer et al | 2016 | UK        | Depression | 15 | Virtual Bodies, adult and child                                                   | nVisor Sx111  |
| Shah et al     | 2015 | Singapore | Stress     | 22 | VR DE-STRESS                                                                      | ITG-PCX3 HMD, |
| Shiban et al   | 2016 | Germany   | Stress     | 45 | In vivo, Tier social stress test (TSST), VRTSST, VRTSST with a virtual competitor | nVisor Sx60   |

#### **Pain Management (n=22)**

|                 |      |      |                                          |                |                                                       |                 |
|-----------------|------|------|------------------------------------------|----------------|-------------------------------------------------------|-----------------|
| Amniabadi et al | 2012 | Iran | Pain and anxiety during dental treatment | 120 (children) | Restorative treatment with and without vr eye glasses | i-glasses 920HR |
|-----------------|------|------|------------------------------------------|----------------|-------------------------------------------------------|-----------------|

|             |      |                 |                                  |    |                                                 |                                        |
|-------------|------|-----------------|----------------------------------|----|-------------------------------------------------|----------------------------------------|
| Bahart      | 2015 |                 | Chronic neck pain                | 32 | Kinematic training vs VR kinematic training     | Vuzix 1200VR                           |
| Bolte et al | 2014 | Germany         | Chronic back pain, Kinesiophobia | 17 | Gain-based visual feedback modification         | Sensics z8ight                         |
| Chen et al  | 2014 | USA             | Kinesiophobia                    | 10 | Target aiming task with altered visual feedback | Oculus Rift                            |
| Czub        | 2012 | Poland          | Analgesia                        | 32 | Heat stimulus while in a VE                     | E-Magin z800                           |
| Czub        | 2014 | Poland          | Analgesia                        | 35 | Memory influence during thermal pain stimulus   | E-Magin z800                           |
| Czub        | 2014 | Poland          | Analgesia                        | 30 | Thermal Stimulus                                | E-Magin z800                           |
| Fabar       | 2013 | The Netherlands | Pain Distraction for burns       | 36 | VR distraction                                  | Cybermind Hi-Res900 <sub>ST</sub> - 3D |
| Garrett     | 2017 | Canada          | Chronic pain                     | 10 | VR therapy                                      | Oculus Rift DK2                        |

|         |      |           |                          |    |                                                        |                                         |
|---------|------|-----------|--------------------------|----|--------------------------------------------------------|-----------------------------------------|
| Harvie  | 2015 | Australia | Neck Pain                | 24 | Visual proprioceptive cues                             | Oculus Rift                             |
| Hoffman | 2014 | USA       | Pediatric burns          | 1  | Occupational therapy with and without VR               | Oculus Rift                             |
| Hua     | 2015 | China     | Lower limb Chronic wound | 65 | VR distraction                                         | E-Magin z800                            |
| Jeffer  | 2016 | USA       | Burn wound care          | 30 | Standard care, passive distraction and VR              | Kaiser Optics SR80a VR helmet with SXGA |
| Kipping | 2012 | Australia | Burn Wound Care          | 41 | VR distraction                                         | eMagin z800                             |
| Piskorz | 2014 | Poland    | Cold Pressor             | 31 | VR distraction tasks at different levels of complexity | Emagin z800                             |
| Sano    | 2015 | Japan     | Phantom Limb pain        | 6  | Reaching task in VR                                    | Oculus Rift                             |
| Sil     | 2014 | USA       | Cold pressor pain        | 62 | VR distraction                                         | 5DT HMD                                 |



|                |      |       |                               |                                  |                               |                 |
|----------------|------|-------|-------------------------------|----------------------------------|-------------------------------|-----------------|
| Spyridonis     | 2012 | UK    | Pain in wheel chair users     | 7                                | Paindroid pain management     | Vuzix 920       |
| Tanja-Dijkstra | 2017 | UK    | Cold Pressor and Dental Pain  | 155 (85 and 75 over two studies) | VR coastal walk               | Vuzix VR920     |
| Tashkian       | 2017 | USA   | Pain in hospitalised patients | 100                              | 3D VR vs 2D distraction video | Samsung Gear VR |
| Wake           | 2015 | Japan | Phantom Limb pain             | 5                                | Visual limb distraction       | Vuzix 1200 VR   |
| Walker et al   | 2014 | USA   | Cystoscopy                    | 45                               | VR distraction                | 5DT             |

### **Addiction Studies (n=9)**

|                     |      |        |                           |     |                                                                            |                    |
|---------------------|------|--------|---------------------------|-----|----------------------------------------------------------------------------|--------------------|
| Acker and Mackillop | 2013 | USA    | Cigarette Addiction       | 47  | VR-CET                                                                     | eMagin z800        |
| Bordnick et al      | 2012 | USA    | Nicotine Dependence       | 46  | NRT (Nicotine replacement Therapy), VRST (Virtual reality skills training) | eMagin Z800.       |
| Bouchard et al      | 2017 | Canada | Gambling addiction        | 64  | VRCBT and CBT                                                              | nVisor SX 60       |
| Giovancarli et al   | 2016 | France | Tabacco Consumption       | 120 | VRET, CBT                                                                  | Sensics ZSight HMD |
| Hadley et al        | 2014 | USA    | Adolescent Risk Reduction | 42  | VRE                                                                        | eMagin z800        |
| Lister et al        | 201  | USA    | Gambling                  | 121 | VR Casino                                                                  | eMagin Z800        |

|                          |      |       |                     |    |                       |                   |
|--------------------------|------|-------|---------------------|----|-----------------------|-------------------|
|                          | 6    |       | Addiction           |    | (Rigged)              |                   |
| Pericot - Valverde et al | 2015 | Spain | Cigarette Addiction | 41 | VR-CET (Cue Exposure) | Vuzix iWear VR920 |
| Pericot - Valverde et al | 2014 | Spain | Cigarette Addiction | 48 | VR-CET                | Vuzix iWear VR920 |
| Thompson-Lake et al      | 2015 | USA   | Cigarette Addiction | 36 | VR-CET                | eMagin z800       |

### **Eating Disorders/Body image (n=5)**

|                             |      |                 |                                                        |     |                                         |                                                                                         |
|-----------------------------|------|-----------------|--------------------------------------------------------|-----|-----------------------------------------|-----------------------------------------------------------------------------------------|
| Gutierrez - Maldonado et al | 2016 | Spain           | Eating Disorder                                        | 113 | VRCE (Virtual Reality Craving Exposure) | Oculus Rift VR HMD DK1, Computer with 3D generated images viewed with polarised glasses |
| Keizer et al                | 2016 | The Netherlands | Anorexia Nervosa.                                      | 59  | VR Full Body Illusion                   | Oculus Rift DK2                                                                         |
| Marco et al                 | 2013 | Spain           | eating disorder (bulimia nervosa, eating disorder NOS) | 34  | VR CBT, controlled CBT                  | V6 by Virtual Research                                                                  |
| Mountford et al             | 2015 | UK              | Body Image Disturbance (BID)                           | 41  | VR to elicit and detect BID             | nVisor SX111,                                                                           |
| Purvis et al                | 2015 | USA             | Body image disturbance (BID)                           | 78  | VR to elicit and detect BID             | nVisor SX111 ,                                                                          |

ANXIETY

Anderson PL, Price M, Edwards SM, Obasaju MA, Schmertz SK, Zimand E, Calamaras MR. Virtual reality exposure therapy for social anxiety disorder: a randomized controlled trial. *Journal of consulting and clinical psychology*. 2013 Oct;81(5):751.

Aymerich-Franch L, Kizilcec RF, Bailenson JN. The relationship between virtual self similarity and social anxiety. *Frontiers in human neuroscience*. 2014;8.

Bouchard S, Dumoulin S, Robillard G, Guitard T, Klinger É, Forget H, Loranger C, Roucaut FX. Virtual reality compared with in vivo exposure in the treatment of social anxiety disorder: a three-arm randomised controlled trial. *The British Journal of Psychiatry*. 2017 Apr 1;210(4):276-83.

Deppermann S, Notzon S, Kroczeck A, Rosenbaum D, Haeussinger FB, Diemer J, Domschke K, Fallgatter AJ, Ehrlis AC, Zwanzger P. Functional co-activation within the prefrontal cortex supports the maintenance of behavioural performance in fear-relevant situations before an iTBS modulated virtual reality challenge in participants with spider phobia. *Behavioural brain research*. 2016 Jul 1;307:208-17.

Dibbets P, Schulte-Ostermann MA. Virtual reality, real emotions: a novel analogue for the assessment of risk factors of post-traumatic stress disorder. *Frontiers in psychology*. 2015;6.

Diemer J, Domschke K, Mühlberger A, Winter B, Zavorotnyy M, Notzon S, Silling K, Arolt V, Zwanzger P. Acute anxiolytic effects of quetiapine during virtual reality exposure—A double-blind placebo-controlled trial in patients with specific phobia. *European Neuropsychopharmacology*. 2013 Nov 30;23(11):1551-60.

Diemer J, Lohkamp N, Mühlberger A, Zwanzger P. Fear and physiological arousal during a virtual height challenge—effects in patients with acrophobia and healthy controls. *Journal of anxiety disorders*. 2016 Jan 31;37:30-9.

Difede J, Cukor J, Wyka K, Olden M, Hoffman H, Lee FS, Altemus M. D-cycloserine augmentation of exposure therapy for post-traumatic stress disorder: a pilot randomized clinical trial. *Neuropsychopharmacology*. 2014 Apr;39(5):1052.

Freeman D, Thompson C, Vorontsova N, Dunn G, Carter LA, Garety P, Kuipers E, Slater M, Antley A, Glucksman E, Ehlers A. Paranoia and post-traumatic stress disorder in the months after a physical assault: a longitudinal study examining shared and differential predictors. *Psychological medicine*. 2013 Dec;43(12):2673-84.

Freeman D, Antley A, Ehlers A, Dunn G, Thompson C, Vorontsova N, Garety P, Kuipers E, Glucksman E, Slater M. The use of immersive virtual reality (VR) to predict the occurrence 6 months later of paranoid thinking and posttraumatic stress symptoms assessed by self-report and interviewer methods: A study of individuals who have been physically assaulted. *Psychological assessment*. 2014 Sep;26(3):841.

Glottbach-Schoon E, Tadda R, Andreatta M, Tröger C, Ewald H, Grillon C, Pauli P, Mühlberger A. Enhanced discrimination between threatening and safe contexts in high-anxious individuals. *Biological psychology*. 2013 Apr 30;93(1):159-66.

Hartanto D, Kampmann IL, Morina N, Emmelkamp PG, Neerincx MA, Brinkman WP. Controlling social stress in virtual reality environments. *PloS one*. 2014 Mar 26;9(3):e92804.

Kampmann IL, Emmelkamp PM, Hartanto D, Brinkman WP, Zijlstra BJ, Morina N. Exposure to virtual social interactions in the treatment of social anxiety disorder: a randomized controlled trial. *Behaviour research and therapy*. 2016 Feb 29;77:147-56.

Levy F, Leboucher P, Rautureau G, Jouvent R. E-virtual reality exposure therapy in acrophobia: A pilot study. *Journal of telemedicine and telecare*. 2016 Jun;22(4):215-20.

Levy F, Leboucher P, Rautureau G, Komano O, Millet B, Jouvent R. Fear of falling: efficacy of virtual reality associated with serious games in elderly people. *Neuropsychiatric disease and treatment*. 2016;12:877.

Malbos E, Rapee RM, Kavakli M. A controlled study of agoraphobia and the independent effect of virtual reality exposure therapy. *Australian & New Zealand Journal of Psychiatry*. 2013 Feb;47(2):160-8.

Meyerbroecker K, Powers MB, Van Stegeren A, Emmelkamp PM. Does yohimbine hydrochloride facilitate fear extinction in virtual reality treatment of fear of flying? A randomized placebo-controlled trial. *Psychotherapy and psychosomatics*. 2012;81(1):29-37.

Morina N, Brinkman WP, Hartanto D, Emmelkamp PM. Sense of presence and anxiety during virtual social interactions between a human and virtual humans. *PeerJ*. 2014 Apr 3;2:e337.

Morina N, Brinkman WP, Hartanto D, Kampmann IL, Emmelkamp PM. Social interactions in virtual reality exposure therapy: A proof-of-concept pilot study. *Technology and Health Care*. 2015 Jan 1;23(5):581-9.

Mosig C, Merz CJ, Mohr C, Adolph D, Wolf OT, Schneider S, Margraf J, Zlomuzica A. Enhanced discriminative fear learning of phobia-irrelevant stimuli in spider-fearful individuals. *Frontiers in behavioral neuroscience*. 2014;8.

Mühlberger A, Neumann R, Lozo L, Müller M, Hettlinger M. Bottom-up and top-down influences of beliefs on emotional responses: fear of heights in a virtual environment.

Norrholm SD, Jovanovic T, Gerardi M, Breazeale KG, Price M, Davis M, Duncan E, Ressler KJ, Bradley B, Rizzo A, Tuerk PW. Baseline psychophysiological and cortisol reactivity as a predictor of PTSD treatment outcome in virtual reality exposure therapy. *Behaviour research and therapy*. 2016 Jul 31;82:28-37.

Notzon S, Deppermann S, Fallgatter A, Diemer J, Kroczeck A, Domschke K, Zwanzger P, Ehrlis AC. Psychophysiological effects of an iTBS modulated virtual reality challenge including participants with spider phobia. *Biological psychology*. 2015 Dec 31;112:66-76.

Pallavicini F, Cipresso P, Raspelli S, Grassi A, Serino S, Vigna C, Triberti S, Villamira M, Gaggioli A, Riva G. Is virtual reality always an effective stressors for exposure treatments? Some insights from a controlled trial. *BMC psychiatry*. 2013 Feb 11;13(1):52.

- Peperkorn HM, Alpers GW, Mühlberger A. Triggers of fear: perceptual cues versus conceptual information in spider phobia. *Journal of clinical psychology*. 2014 Jul 1;70(7):704-14.
- Peperkorn HM, Diemer JE, Alpers GW, Mühlberger A. Representation of patients' hand modulates fear reactions of patients with spider phobia in virtual reality. *Frontiers in psychology*. 2016;7.
- Powers MB, Briceno NF, Gresham R, Jouriles EN, Emmelkamp PM, Smits JA. Do conversations with virtual avatars increase feelings of social anxiety?. *Journal of anxiety disorders*. 2013 May 31;27(4):398-403.
- Price M, Maples JL, Jovanovic T, Norrholm SD, Heekin M, Rothbaum BO. An investigation of outcome expectancies as a predictor of treatment response for combat veterans with PTSD: Comparison of clinician, self-report, and biological measures. *Depression and anxiety*. 2015 Jun;32(6):392.
- Reger GM, Koenen-Woods P, Zetocha K, Smolenski DJ, Holloway KM, Rothbaum BO, Difede J, Rizzo AA, Edwards-Stewart A, Skopp NA, Mishkind M. Randomized controlled trial of prolonged exposure using imaginal exposure vs. virtual reality exposure in active duty soldiers with deployment-related posttraumatic stress disorder (PTSD).
- Rinck M, Koene M, Telli S, Moerman-van den Brink W, Verhoeven B, Becker ES. The time course of location-avoidance learning in fear of spiders. *Cognition and Emotion*. 2016 Apr 2;30(3):430-43.
- Rothbaum BO, Price M, Jovanovic T, Norrholm SD, Gerardi M, Dunlop B, Davis M, Bradley B, Duncan EJ, Rizzo A, Ressler KJ. A randomized, double-blind evaluation of D-cycloserine or alprazolam combined with virtual reality exposure therapy for posttraumatic stress disorder in Iraq and Afghanistan War veterans. *American Journal of Psychiatry*. 2014 Jun;171(6):640-8.
- Rus-Calafell M, Gutiérrez-Maldonado J, Botella C, Baños RM. Virtual reality exposure and imaginal exposure in the treatment of fear of flying: A pilot study. *Behavior modification*. 2013 Jul;37(4):568-90.
- Safir MP, Wallach HS, Bar-Zvi M. Virtual reality cognitive-behavior therapy for public speaking anxiety: one-year follow-up. *Behavior modification*. 2012 Mar;36(2):235-46.
- Shiban Y, Peperkorn H, Alpers GW, Pauli P, Mühlberger A. Influence of perceptual cues and conceptual information on the activation and reduction of claustrophobic fear. *Journal of behavior therapy and experimental psychiatry*. 2016 Jun 30;51:19-26.
- Shiban Y, Fruth MB, Pauli P, Kinateder M, Reichenberger J, Mühlberger A. Treatment effect on biases in size estimation in spider phobia. *Biological psychology*. 2016 Dec 31;121:146-52.
- Shiban Y, Brütting J, Pauli P, Mühlberger A. Fear reactivation prior to exposure therapy: does it facilitate the effects of VR exposure in a randomized clinical sample?. *Journal of behavior therapy and experimental psychiatry*. 2015 Mar 31;46:133-40.
- Shiban Y, Reichenberger J, Neumann ID, Mühlberger A. Social conditioning and extinction paradigm: a translational study in virtual reality. *Frontiers in psychology*. 2015;6.

Shiban Y, Schelhorn I, Pauli P, Mühlberger A. Effect of combined multiple contexts and multiple stimuli exposure in spider phobia: a randomized clinical trial in virtual reality. *Behaviour research and therapy*. 2015 Aug 31;71:45-53.

Shiban Y, Wittmann J, Weißinger M, Mühlberger A. Gradual extinction reduces reinstatement. *Frontiers in behavioral neuroscience*. 2015;9.

Urech A, Krieger T, Chesham A, Mast FW, Berger T. virtual reality-based attention bias modification training for social anxiety: a feasibility and proof of concept study. *Frontiers in psychiatry*. 2015;6.

Webb AK, Vincent AL, Jin AB, Pollack MH. Physiological reactivity to nonideographic virtual reality stimuli in veterans with and without PTSD. *Brain and behavior*. 2015 Feb 1;5(2).

Won AS, Perone B, Friend M, Bailenson JN. Identifying anxiety through tracked head movements in a virtual classroom. *Cyberpsychology, Behavior, and Social Networking*. 2016 Jun 1;19(6):380-7.

## **Pain Management**

Aminabadi NA, Erfanparast L, Sohrabi A, Oskouei SG, Naghili A. The impact of virtual reality distraction on pain and anxiety during dental treatment in 4-6 year-old children: a randomized controlled clinical trial. *Journal of dental research, dental clinics, dental prospects*. 2012;6(4):117.

Bahat HS, Takasaki H, Chen X, Bet-Or Y, Treleaven J. Cervical kinematic training with and without interactive VR training for chronic neck pain—a randomized clinical trial. *Manual therapy*. 2015 Feb 1;20(1):68-78.

Bolte, B. Virtual reality system for the enhancement of mobility in patients with chronic back pain. *International Journal of Child Health and Human Development*. 2016 Jul 1;9(3):305.

Chen KB, Ponto K, Sesto ME, Radwin RG. Influence of altered visual feedback on neck movement for a virtual reality rehabilitative system. In *Proceedings of the Human Factors and Ergonomics Society Annual Meeting 2014 Sep (Vol. 58, No. 1, pp. 693-697)*. Sage CA: Los Angeles, CA: SAGE Publications.

Czub M, Piskorz J. Effectiveness of Different Virtual Reality Environments on Thermal Pain Distraction. *Polish Journal of Applied Psychology*. 2012;10(2):7-19.

Czub M, Piskorz J, Misiewicz M, Hodowaniec P, Mrula M, Urbańska K. Influence of memory on experienced pain during Virtual Reality analgesia. *Polish Journal of Applied Psychology*. 2014 Dec 1;12(4):41-52

Czub M, Piskorz J. How body movement influences virtual reality analgesia?. In *Interactive Technologies and Games (ITAG), 2014 International Conference on 2014 Oct 16 (pp. 13-19)*. IEEE.

Faber AW, Patterson DR, Bremer M. Repeated use of immersive virtual reality therapy to control pain during wound dressing changes in pediatric and adult burn patients. *Journal of Burn Care & Research*. 2013 Sep 1;34(5):563-8.

- Garrett B, Taverner T, McDade P. Virtual Reality as an Adjunct Home Therapy in Chronic Pain Management: An Exploratory Study. *JMIR medical informatics*. 2017 Apr;5(2).
- Gromala D, Tong X, Choo A, Karamnejad M, Shaw CD. The virtual meditative walk: virtual reality therapy for chronic pain management. In *Proceedings of the 33rd Annual ACM Conference on Human Factors in Computing Systems 2015* Apr 18 (pp. 521-524). ACM.
- Harvie DS, Broecker M, Smith RT, Meulders A, Madden VJ, Moseley GL. Bogus visual feedback alters onset of movement-evoked pain in people with neck pain. *Psychological Science*. 2015 Apr;26(4):385-92.
- Hoffman HG, Meyer III WJ, Ramirez M, Roberts L, Seibel EJ, Atzori B, Sharar SR, Patterson DR. Feasibility of articulated arm mounted Oculus Rift Virtual Reality goggles for adjunctive pain control during occupational therapy in pediatric burn patients. *Cyberpsychology, Behavior, and Social Networking*. 2014 Jun 1;17(6):397-401.
- Hua Y, Qiu R, Yao WY, Zhang Q, Chen XL. The effect of virtual reality distraction on pain relief during dressing changes in children with chronic wounds on lower limbs. *Pain Management Nursing*. 2015 Oct 1;16(5):685-91.
- Jefferies D, Dorman D, Brown S, Files A, Graves T, Kirk E, Meredith-Neve S, Sanders J, White B, Swearingen CJ. Effect of virtual reality on adolescent pain during burn wound care. *Journal of Burn Care & Research*. 2014 Sep 1;35(5):395-408.
- Kipping B, Rodger S, Miller K, Kimble RM. Virtual reality for acute pain reduction in adolescents undergoing burn wound care: a prospective randomized controlled trial. *Burns*. 2012 Aug 1;38(5):650-7.
- Piskorz J, Czub M. Distraction of attention with the use of virtual reality. Influence of the level of game complexity on the level of experienced pain. *Polish Psychological Bulletin*. 2014 Dec 1;45(4):480-7.
- Sano Y, Ichinose A, Wake N, Osumi M, Sumitani M, Kumagaya SI, Kuniyoshi Y. Reliability of phantom pain relief in neurorehabilitation using a multimodal virtual reality system. In *Engineering in Medicine and Biology Society (EMBC), 2015 37th Annual International Conference of the IEEE 2015* Aug 25 (pp. 2482-2485). IEEE.
- Sil S, Dahlquist LM, Thompson C, Hahn A, Herbert L, Wohlheiter K, Horn S. The effects of coping style on virtual reality enhanced videogame distraction in children undergoing cold pressor pain. *Journal of behavioral medicine*. 2014 Feb 1;37(1):156-65.
- Spyridonis F, Grønli TM, Hansen J, Ghinea G. Evaluating the usability of a virtual reality-based Android application in managing the pain experience of wheelchair users. In *Engineering in Medicine and Biology Society (EMBC), 2012 Annual International Conference of the IEEE 2012* Aug 28 (pp. 2460-2463). IEEE.
- Tanja-Dijkstra K, Pahl S, White MP, Auvray M, Stone RJ, Andrade J, May J, Mills I, Moles DR. The Soothing Sea: A Virtual Coastal Walk Can Reduce Experienced and Recollected Pain. *Environment and Behavior*. 2017:0013916517710077.

Tashjian VC, Mosadeghi S, Howard AR, Lopez M, Dupuy T, Reid M, Martinez B, Ahmed S, Dailey F, Robbins K, Rosen B. Virtual reality for management of pain in hospitalized patients: results of a controlled trial. *JMIR mental health*. 2017 Jan;4(1).

Wake N, Sano Y, Oya R, Sumitani M, Kumagaya SI, Kuniyoshi Y. Multimodal virtual reality platform for the rehabilitation of phantom limb pain. In *Neural Engineering (NER), 2015 7th International IEEE/EMBS Conference on 2015 Apr 22 (pp. 787-790)*. IEEE.

Walker MR, Kallingal GJ, Musser JE, Folen R, Stetz MC, Clark JY. Treatment efficacy of virtual reality distraction in the reduction of pain and anxiety during cystoscopy. *Military medicine*. 2014 Aug 1;179(8):891-6.

## **DEPRESSION/STRESS**

Cikajlo, Imre, Ursa Cizman Staba, Suzana Vrhovac, Frances Larkin, and Mark Roddy. "A Cloud-Based Virtual Reality App for a Novel Telemindfulness Service: Rationale, Design and Feasibility Evaluation." *JMIR research protocols* 6, no. 6 (2017).

Falconer CJ, Rovira A, King JA, Gilbert P, Antley A, Fearon P, Ralph N, Slater M, Brewin CR. Embodying self-compassion within virtual reality and its effects on patients with depression. *British Journal of Psychiatry Open*. 2016 Jan 1;2(1):74-80.

Shah LB, Torres S, Kannusamy P, Chng CM, He HG, Klainin-Yobas P. Efficacy of the virtual reality-based stress management program on stress-related variables in people with mood disorders: the feasibility study. *Archives of psychiatric nursing*. 2015 Feb 28;29(1):6-13.

Shiban Y, Diemer J, Brandl S, Zack R, Mühlberger A, Wüst S. Trier social stress test in vivo and in virtual reality: Dissociation of response domains. *International Journal of Psychophysiology*. 2016 Dec 31;110:47-55.

## **ADDICTION**

Acker J, MacKillop J. Behavioral economic analysis of cue-elicited craving for tobacco: a virtual reality study. *nicotine & tobacco research*. 2013 Jan 15;15(8):1409-16..

Bordnick PS, Traylor AC, Carter BL, Graap KM. A feasibility study of virtual reality-based coping skills training for nicotine dependence. *Research on social work practice*. 2012 May;22(3):293-300.

Bouchard S, Robillard G, Giroux I, Jacques C, Loranger C, St-Pierre M, Chrétien M, Goulet A. Using Virtual reality in the Treatment of gambling Disorder: The Development of a new Tool for cognitive Behavior Therapy. *Frontiers in psychiatry*. 2017;8.

Giovancarli C, Malbos E, Baumstarck K, Parola N, Pélissier MF, Lançon C, Auquier P, Boyer L. Virtual reality cue exposure for the relapse prevention of tobacco consumption: a study protocol for a randomized controlled trial. *Trials*. 2016 Feb 19;17(1):96



Hadley W, Houck CD, Barker DH, Garcia AM, Spitalnick JS, Curtis V, Roye S, Brown LK. Eliciting Affect via Immersive Virtual Reality: A Tool for Adolescent Risk Reduction. *Journal of pediatric psychology*. 2013 Dec 23;39(3):358-68.

Lister JJ, Nower L, Wohl MJ. Gambling goals predict chasing behavior during slot machine play. *Addictive behaviors*. 2016 Nov 30;62:129-34.

Pericot-Valverde I, García-Rodríguez O, Gutiérrez-Maldonado J, Secades-Villa R. Individual variables related to craving reduction in cue exposure treatment. *Addictive behaviors*. 2015 Oct 31;49:59-63.

Pericot-Valverde I, Secades-Villa R, Gutiérrez-Maldonado J, García-Rodríguez O. Effects of systematic cue exposure through virtual reality on cigarette craving. *nicotine & tobacco research*. 2014 Jun 23;16(11):1470-7.

Thompson-Lake DG, Cooper KN, Mahoney III JJ, Bordnick PS, Salas R, Kosten TR, Dani JA, De La Garza R. Withdrawal symptoms and nicotine dependence severity predict virtual reality craving in cigarette-deprived smokers. *Nicotine & Tobacco Research*. 2014 Dec 4;17(7):796-802..

## **EATING DISORDERS**

Gutiérrez-Maldonado J, Pla-Sanjuanelo J, Ferrer-García M. Cue-exposure software for the treatment of bulimia nervosa and binge eating disorder. *Psicothema*. 2016;28(4).

Keizer A, van Elburg A, Helms R, Dijkerman HC. A virtual reality full body illusion improves body image disturbance in anorexia nervosa. *PloS one*. 2016 Oct 6;11(10):e0163921.

Marco JH, Perpina C, Botella C. Effectiveness of cognitive behavioral therapy supported by virtual reality in the treatment of body image in eating disorders: one year follow-up. *Psychiatry Research*. 2013 Oct 30;209(3):619-25.

Mountford VA, Tchanturia K, Valmaggia L. "What Are You Thinking When You Look at Me?" A Pilot Study of the Use of Virtual Reality in Body Image. *Cyberpsychology, Behavior, and Social Networking*. 2016 Feb 1;19(2):93-9.

Purvis CK, Jones M, Bailey JO, Bailenson J, Taylor CB. Developing a novel measure of body satisfaction using virtual reality. *PloS one*. 2015 Oct 15;10(10):e0140158.
