# Supplementary material for: Head-Mounted Virtual Reality and Mental Health: Critical Review of Current Research
Source: PubMed Central journal article supplement (PMC6054705; doi:10.2196/games.9226), 2018-07-06
Supplement: games_v6i3e14_app2.pdf [file games_v6i3e14_app2.pdf]

| Type                                | Resolution                                                        | Hz    | Field of View (diagonal unless stated otherwise) | Number of Studies |
|-------------------------------------|-------------------------------------------------------------------|-------|--------------------------------------------------|-------------------|
| eMagin z800                         | 800 x 600                                                         | 60 Hz | 40°D                                             | 34                |
| nVisor SX60                         | 1280 x 1024                                                       | 60Hz  | 60°D                                             | 8                 |
| nVisor SX111                        | 1280 x 1024                                                       | 60Hz  | 111°D                                            | 4                 |
| nVisor ST50                         | 1280 x 1024                                                       | 60 Hz | 50°D                                             | 1                 |
| Sony HMZ-T1                         | 1280 x 720                                                        | 60 Hz | 51.6°D                                           | 1                 |
| 5DT HMD                             | 800 x 600                                                         | -     | 40°D                                             | 3                 |
| VisuaStim                           | 1280 x 1024                                                       | 85 Hz | 40°D                                             | 1                 |
| Kaiser XL 50                        | 1024 x 768                                                        | 60 Hz | 50°D                                             | 1                 |
| VR1280                              | 1280 x 1024                                                       | 60 Hz | 60°D                                             | 1                 |
| Virtual Realities VR HMD pro 3D-42  | 800 x 600                                                         | -     | 42 (assumed diagonal)                            | 1                 |
| Cybermind Visette Pro               | 640 x 480                                                         | 60 Hz | 71.5°D                                           | 2                 |
| Vuzix iWear VR920                   | 640 x 480                                                         | -     | -                                                | 5                 |
| Vuzix VR1200                        | -                                                                 | -     | -                                                | 2                 |
| VFX3D                               | 640 x 480                                                         | -     | 35°D                                             | 1                 |
| Sensis Zsight                       | 1280 x 1024                                                       | 60Hz  | 60°D                                             | 2                 |
| V6 by Virtual Research Systems      | 640 x 480                                                         | 60Hz  | 60°D                                             | 1                 |
| V8 by Virtual Research Systems      | 640x480                                                           | 60Hz  | 60                                               | 1                 |
| Oculus Rift DK1                     | 640 x 800                                                         | 60Hz  | 110°D                                            | 1                 |
| Oculus Rift DK2                     | 960 x 1080                                                        | 75Hz  | 100°D                                            | 6                 |
| ITV goggles ITG Wideview XI edition | -                                                                 | -     | -                                                | 1                 |
| Samsung Gear VR                     | 2560 x 1440<br>* (Super AMOLED and dependent on smartphone used ) | 60 Hz | 96 °D                                            | 1                 |
| i-glasses 920HR                     | -                                                                 | -     | 35°D                                             | 1                 |
| Kaiser Optics SR80a                 | -                                                                 | -     | -                                                | 1                 |

**TABLE 2 - Head Mounted Display Specifications**

\* AMOLED (active-matrix organic light-emitting diode)

Below: A comparison of capable HMDs commonly sold on the market today.

|                 |                          |                             |                       |   |
|-----------------|--------------------------|-----------------------------|-----------------------|---|
| HTC Vive        | 2160 x 1200              | 90 Hz                       | 110°D                 | - |
| HTC Vive Pro    | 2880 x 1600              | 90Hz                        | 110°D                 | - |
| Playstaion VR   | 1920 x 1080              | 90Hz (120Hz in cinema mode) | 100°D (approximately) | - |
| Samsung Odyssey | 1,440 x 1,600 per screen | 90 - 60 Hz                  | 110°D                 | - |
